# Supplementary material
Source: publisher figshare collection journal article supplement (https://sage.figshare.com/ndownloader/files/12744389)
Supplement: Supplementary file 1 [file 12744389]

## Supplementary Material

### Appendix

#### Appendix A. Screenshots of Task 1 and Task 2

| T1: Taking and sharing a picture                                                                                                                                                                                                                                                                                                                                                                                                                                                                                                                                         | T2: Uploading a stored image                                                                                                                                                                                                                                                                                                                                                                                                                                                                                                                                                                                                       |
|--------------------------------------------------------------------------------------------------------------------------------------------------------------------------------------------------------------------------------------------------------------------------------------------------------------------------------------------------------------------------------------------------------------------------------------------------------------------------------------------------------------------------------------------------------------------------|------------------------------------------------------------------------------------------------------------------------------------------------------------------------------------------------------------------------------------------------------------------------------------------------------------------------------------------------------------------------------------------------------------------------------------------------------------------------------------------------------------------------------------------------------------------------------------------------------------------------------------|
| <p>Primero, ¿podrías enviarnos una foto de lo que ves ahora mismo? Para esto, haz click en el dibujo de la cámara, selecciona la cámara y haz la foto de lo que tienes en frente de ti ahora mismo. Después, haz click en OK y espéra algunos segundos hasta que se muestre la confirmación. Finalmente presiona el botón "siguiente" para continuar a la siguiente página.</p>  <p><input type="radio"/> No entiendo cómo hacerlo</p> <div><div>&lt;</div><div>&gt;</div></div> <hr/> | <p>Segundo, ¿podrías enviarnos una foto o imagen que ya tengas guardada en tu teléfono de algo que te hizo reír? Para esto, haz click en el dibujo de archivo, y selecciona "documentos" para ir a buscar una foto o imagen en tu teléfono. Después, haz click en la foto o la imagen y espéra algunos segundos hasta que se muestre la confirmación. Finalmente presiona el botón "siguiente" para continuar a la siguiente página.</p>  <p><input type="radio"/> No entiendo cómo hacerlo</p> <div><div>&lt;</div><div>&gt;</div></div> <hr/> |

## Appendix B. Examples of images similarly and not similarly coded

| Tags                                                                                                              |                                                       |                                     |
|-------------------------------------------------------------------------------------------------------------------|-------------------------------------------------------|-------------------------------------|
| T1: Taking and sharing a picture                                                                                  | Google Vision                                         | Human Coder                         |
|                                  | Sky; City; Urban area; Landmark; Building             | City; Street; Buildings             |
|                                 | Bottle; Product design                                | Keyboard; Screen; Smartphone; Water |
| T2: Uploading a stored image                                                                                      | Google Vision                                         | Human Coder                         |
|                                | Dog; Dog like mammal; Dog breed group; Morkie         | Dog                                 |
| <p>Las drogas destruyen 🤔</p>  | Product; Product; Technology; Product design; Plastic | R2D2; Drugs; Joke; Text             |

**Appendix C. Sociodemographic differences between participants uploading a meaningful image and those uploading a nonmeaningful image.**

| <b>Socio-demographic variables</b>        | <b>T1: Taking and sharing a picture</b> |                       | <b>T2: Uploading a stored image</b> |                       |
|-------------------------------------------|-----------------------------------------|-----------------------|-------------------------------------|-----------------------|
|                                           | <b>Meaningful</b>                       | <b>Not meaningful</b> | <b>Meaningful</b>                   | <b>Not meaningful</b> |
| Men (in %)                                | 48.4                                    | 51.0                  | 49.0                                | 51.0                  |
| Daily Internet use (in %)                 | 97.3                                    | 95.6                  | 97.7 **                             | 95.1                  |
| Big city (in %)                           | 43.6                                    | 40.3                  | 42.6                                | 41.2                  |
| Age (mean on continuous scale)            | 25.9                                    | 25.4                  | 25.4                                | 25.8                  |
| Extraversion (mean on scale -9 to 9)      | .6                                      | .2                    | .5                                  | .3                    |
| Creativity (mean on scale -9 to 9)        | 4.6                                     | 4.4                   | 4.7**                               | 4.2                   |
| Laziness (mean on scale -9 to 9)          | -1.5                                    | -1.7                  | -1.5                                | -1.7                  |
| No. SNS use weekly (mean on scale 0 to 6) | 2.4**                                   | 2.2                   | 2.4**                               | 2.2                   |
| N                                         | 662                                     | 972                   | 800                                 | 845                   |

*Note:* ‘Meaningful’ refers to the respondents who sent an image that was in line with the question whereas ‘Not Meaningful’ refers to images not in line. The stars in column ‘Meaningful’ indicates when differences between proportions or means are statistically significant between groups; \*  $p < 0.05$  \*\*  $p < 0.01$
